# Supplementary material for: Are current guidelines for sun protection optimal for health? Exploring the evidence
Source: Royal Society of Chemistry journal article supplement (doi:10.1039/c7pp00374a), 2018-06-15
Supplement: c7pp00374a1.pdf [file c7pp00374a1.pdf]

## 1 Supplementary data

### 2 Spectral data

3 The UV spectral region of interest at Earth's surface is shown in Figure S1, including the UVA  
4 (315-400nm) and UVB (280-315nm) bands delimited by the vertical dashed lines. Action  
5 spectra for erythema induction<sup>1</sup> and vitamin D production<sup>2</sup> are also shown, and the substantial  
6 UVA "tail" is clearly evident for erythema. Also shown are typical clear-sky spectral  
7 irradiances, for several solar zenith angles and ozone columns (integrated UVA and UVB values  
8 are given in Table 1). Note that changes in ozone affect mostly UVB wavelengths, while  
9 variations of solar zenith angle affect all wavelengths.

10 **Figure S1:** Left (logarithmic) scale shows action spectra for (red) human erythema induction<sup>1</sup>  
11 and (blue) vitamin D production,<sup>2</sup> and their decrease toward longer wavelengths. The right  
12 (logarithmic) scale shows the spectral irradiance at Earth's surface (cloud-free and unpolluted),  
13 in decreasing order for (black) overhead sun and low ozone column (in Dobson units, du), (cyan)  
14 overhead sun and moderate ozone column, and (green) 60° solar zenith angle and moderate  
15 ozone column. Spectral irradiances were computed with the TUV model (version 5.3) and  
16 smoothed with a running 5 nm filter, boxcar (rectangular) average, i.e. simple average of central  
17 point and the two on each side of it; value is assigned to the wavelength of the central point.  
18 Vertical dashed lines show the defining wavelengths for UVB (280-315 nm) and UVA (315-400  
19 nm). Higher resolution is available at [http://cprm.acom.ucar.edu/Models/TUV/Interactive\\_TUV/](http://cprm.acom.ucar.edu/Models/TUV/Interactive_TUV/)

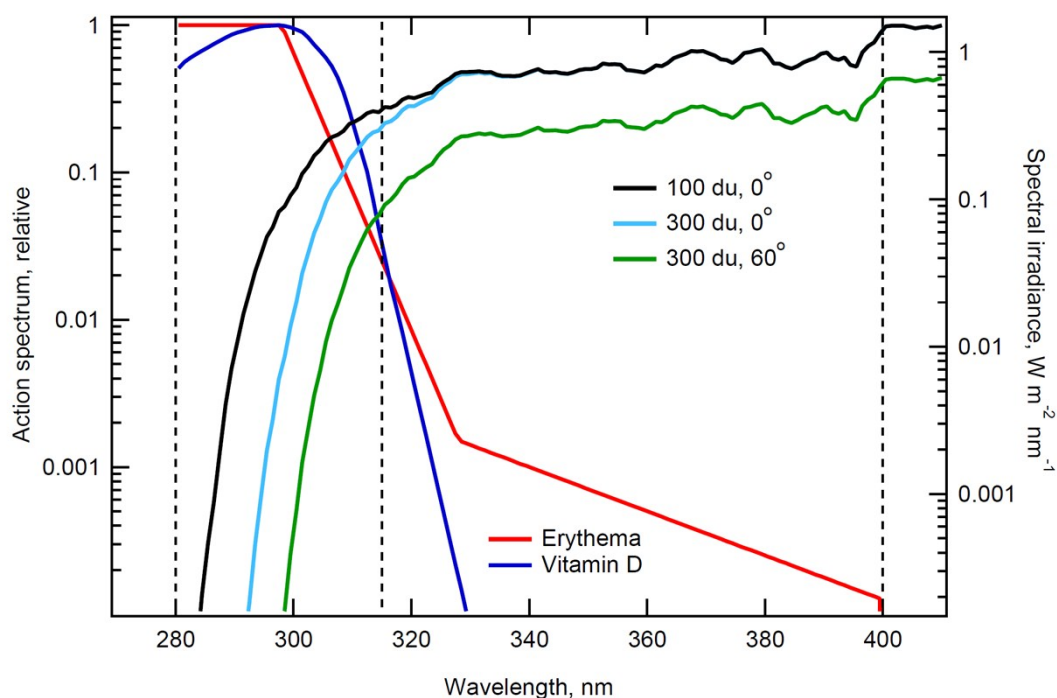

21

## 22 *UVA Immunosuppression*

23 In the study by Damian and colleagues, the cessation of the allergic reaction after UV irradiation  
24 indicates the amount of UV radiation required to induce immunosuppression in these  
25 volunteers.<sup>3</sup> The Fitzpatrick skin classifications<sup>4</sup> were mainly Type II (55%) and Type III (37%)  
26 and exposure protocols included UVA only, UVB only or solar simulated UV (SSUV) which  
27 includes both UVA and UVB, ranging from once only to daily for 5 days (see Table S1).

28 Immunosuppression was quantified<sup>3</sup> as  $\Delta EI = EI$  (unirradiated control) –  $EI$  (irradiated test site),  
29 where  $EI$  is the erythema index, determined by the skin reddening measured by reflectance  
30 spectroscopy. Prior to any irradiation, there will be some allergic skin reddening, with no  
31 immunosuppressive reduction of the skin reflectance (i.e.,  $\Delta EI = 0$ ). As exposure increases, the  
32 reddening diminishes (i.e.,  $\Delta EI$  increases) until an exposure level is reached where no further  
33 improvement is noted, and  $\Delta EI$  starts to decrease. The exposure at which this occurs is the target  
34 irradiance for optimal immunosuppression. Results are shown in Table S2 and Figure S3.

35 The largest immunosuppression occurred for irradiation from the solar simulator; however this  
36 contained both UVA and UVB wavelengths. To investigate the effects of UVA and UVB  
37 separately we use the data from the waveband specific exposures.

38 For UVA exposure, maximum effects were seen after 3 days.

39  $Exposure\ dose = 3 \times 19420\ Jm^{-2}$

40  $\quad = 58260\ Jm^{-2}$

41  $\quad \approx 6 \times 10^4\ Jm^{-2}$

42 The maximum UVA from Figure 1a for a UVI of 3 is  $45\ Wm^{-2}$ . At this level, the time to reach  
43 this highest immunosuppressive UVA exposure dose is  $6 \times 10^4\ Jm^{-2} / 45Wm^{-2} = 1333$  seconds, or  
44 22 minutes. We note, however, that the uncertainties in these estimates are substantial. Sources  
45 of uncertainty include the scatter in the data (shown in Figure S3), uncertainty in estimating the  
46 time evolution of the effects, and differences between the spectral distribution of the artificial  
47 sources and sunlight.

48

49

50 *UVB Immunosuppression*

51 For UVB exposure, maximum immune suppression was seen after 4 days.

52 Exposure = 4 x 1430 Jm<sup>-2</sup>

53 = 5720 Jm<sup>-2</sup>

54 At noon in summer, the UVB irradiance (to 320 nm) is approximately 3.5 Wm<sup>-2</sup> (or 2 Wm<sup>-2</sup> (to  
55 315 nm), or UVI=11).

56 Therefore, at noon in summer for UVI=11, the time to reach highest immunosuppressive UVB  
57 dose is 5720 Jm<sup>-2</sup> /3.5Wm<sup>-2</sup> = 1600 seconds (about 27 minutes). This is much longer than the ~ 6  
58 minutes per day noted by Damian and colleagues.<sup>3</sup> We note that their value was for the standard  
59 European Sun (SZA=20, ozone=305 DU)<sup>5</sup> with a UVI around 9, i.e., slightly lower than our  
60 higher assumed summer UVI of 11, and also that there are considerable differences in spectral  
61 shape between the artificial source and sunlight. Furthermore we have used a different boundary  
62 between UVA and UVB, which has little effect on UVA but a more marked effect on UVB. For  
63 example, in noon summer sunlight the UVB assumed by Damian and colleagues (i.e., up to 320  
64 nm) is a factor of two greater than in our definition of UVB (i.e., to 315 nm).

65 The main point to note is that these immunosuppressive effects from UVA (and also from UVB)  
66 can occur in time scales of a few minutes that are comparable with the times for erythema.

68

69 **Table S1.** Characteristics of light sources used in UV immunosuppression studies (derived from  
70 data in<sup>3</sup>). Also shown are the corresponding characteristics for noon summer sunlight at Lauder,  
71 New Zealand (45°S), where values are derived from the same instrument as used to generate the  
72 data in Figure 1.

|                               |                                     | UVB<br>(290-320) | UVA-II<br>(320-340) | UVA-I<br>(340-400) | UVA<br>(320-400) |
|-------------------------------|-------------------------------------|------------------|---------------------|--------------------|------------------|
| Solar Simulator<br>28 seconds | <i>Irradiation</i> ( $Wm^{-2}$ )    | 51               | 97                  | 266                | 363              |
|                               | Daily Dose ( $Jm^{-2}$ )            | 1430             | 2710                | 7450               | 10160            |
| UVA lamp<br>70 seconds        | <i>Irradiation</i> ( $Wm^{-2}$ )    | 0.06             | 33                  | 244                | 277              |
|                               | Daily Dose ( $Jm^{-2}$ )            | 0                | 2330                | 17090              | 19420            |
| UVB lamp<br>28 seconds        | <i>Irradiation</i> ( $Wm^{-2}$ )    | 51               | 44                  | 19                 | 63               |
|                               | Daily Dose ( $Jm^{-2}$ )            | 1440             | 1230                | 530                | 1760             |
| Noon summer at<br>Lauder, 45S | <i>Irradiation</i> ( $Wm^{-2}$ )    | 4                |                     |                    | 60               |
|                               | Dose for 5 minutes<br>( $Jm^{-2}$ ) | 1200             |                     |                    | 18000            |

73

74 The slight mismatch between displayed irradiances and doses is due to rounding errors in the values reported by  
75 Damian and colleagues<sup>3</sup>. In this work, the older definition for the UVA and UVB boundary of 320 nm was used,  
76 rather than the currently accepted 315 nm boundary. Although that choice makes a large difference to the UVB  
77 integral (for UVB the integral to 320nm is about twice that to 315 nm, it has only a minor effect on UVA, which is  
78 the focus here.

80

81 **Table S2.** Immune-suppression observed ( $\Delta EI$ ) as a function of the cumulative UVB and UVA  
82 doses (in  $Jm^{-2}$ ) from each source <sup>3</sup>.

|       | Solar simulator* |          |             | UVA lamp |          |             | UVB lamp |          |             |
|-------|------------------|----------|-------------|----------|----------|-------------|----------|----------|-------------|
|       | UVB Dose         | UVA Dose | $\Delta EI$ | UVB Dose | UVA Dose | $\Delta EI$ | UVB Dose | UVA Dose | $\Delta EI$ |
| Day 0 | 0                | 0        | 0.0         | 0        | 0        | 0.0         | 0        | 0        | 0.0         |
| Day 1 | 1430             | 10160    | 13.7        | 0        | 19420    | 15.4        | 1440     | 1760     | 8.6         |
| Day 2 | 2860             | 20320    | 26.6        | 0        | 38840    | 14.7        | 2880     | 3520     | 11.9        |
| Day 3 | 4290             | 30480    | 19.9        | 0        | 58260    | 24.7        | 4320     | 5280     | 11.3        |
| Day 4 | 5720             | 40640    | 28          | 0        | 77680    | 10          | 5760     | 7040     | 19.7        |
| Day 5 | 7150             | 50800    | -           | 0        | 97100    | 7.5         | 7200     | 8800     | 12.8        |

83 \*Note that the solar simulator and the UVB source each contained significant amounts of both UVA and UVB, so it  
84 is difficult to isolate their individual contributions.

**Figure S2:** Effect of UVA irradiation on immunosuppression. Symbols correspond to the cumulative doses for day 1 to day 5 (plotted from data in<sup>3</sup>). While the UVA lamp contained no UVB, the other two lamps contained both UVB and some UVA, as shown in Table S2.

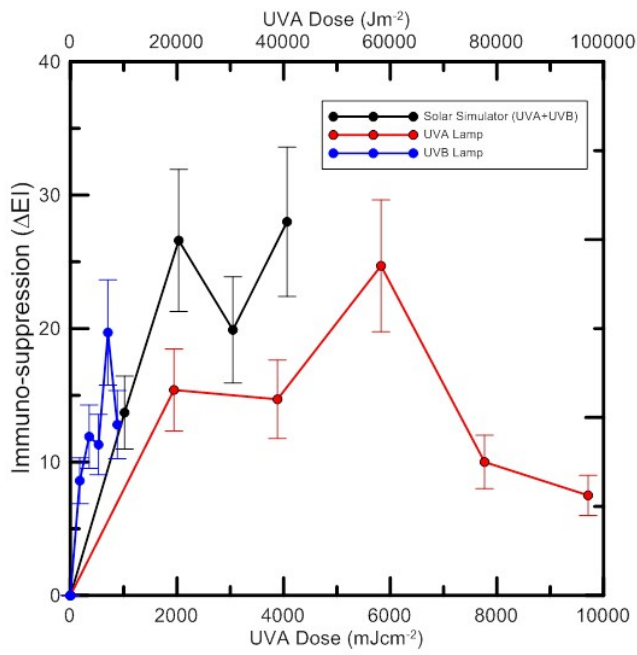

**Table S3.** Assessment of factors to consider in using the UV Index as a guide to time outdoors and sun exposure

| BIOLOGICAL ENDPOINT | Action spectrum              | Central wavelength | Threshold                                                                     | Time scale | Reciprocity on short (episode) timescale | Saturation?                                   | Reciprocity on lifetime scale (cumulative?)           | Systemic or local? | Strategy to optimize                                                | Notes                                                                            |
|---------------------|------------------------------|--------------------|-------------------------------------------------------------------------------|------------|------------------------------------------|-----------------------------------------------|-------------------------------------------------------|--------------------|---------------------------------------------------------------------|----------------------------------------------------------------------------------|
| Erythema            | CIE <sup>1</sup>             | 309                | 1 MED ~ 2 SED for skin type II                                                | 0·3-3 days | yes                                      | yes/tanning                                   | no                                                    | Local              | < 1MED = 2 SED, e.g. limit time < 20 min if UVI > 6;                | Changes with skin type. 1MED=2SED only for type II                               |
| Skin cancer         | SCUP-h <sup>1</sup>          | 309                | None?                                                                         | 3-30 years | unclear                                  | no?                                           | yes                                                   | Local              | Avoid erythema                                                      | Is tanning protective, or is it evidence of cumulative damage?                   |
| Skin cancer         | UVA-role                     | 315-400            | Same as immune suppression?                                                   | 3-30 years | unclear                                  | no?                                           | yes                                                   | Systemic           | possible with UVI<3 with long duration of exposure                  | Nucleotide excision repair and immune suppression may be important               |
| Immune suppression  | UVB & UVA                    | 280-400            | 6 x 10 <sup>4</sup> Jm <sup>-2</sup> UVA or 22 minutes at 45 Wm <sup>-2</sup> | 0·3 days   | yes                                      | probably                                      | Immune suppression may not be cumulative per se       | Local and systemic | possible with UVI<3 with long duration of exposure                  | Not clear what happens for skin types other than II and non-allergic individuals |
| Vitamin D           | Vitamin -D, CIE <sup>2</sup> | 307                | 1·3 SED                                                                       | 0·3-3 day  | yes                                      | yes: reach steady state for moderate exposure | Assume no long term memory of past vitamin D exposure | Systemic           | 1 hour (60 mins)/UVI = 1 SED < Time < 1.3 SED, three times per week |                                                                                  |
| DNA damage          | Setlow <sup>1</sup>          | 304                | None?                                                                         | 0·3-3 days | probably                                 | no                                            |                                                       | Local              |                                                                     | Non-human model                                                                  |
|                     |                              |                    |                                                                               |            |                                          |                                               |                                                       |                    |                                                                     |                                                                                  |

Action spectrum: describes the relative biological effectiveness of different wavebands of UVR for the specific outcome. The Table details the action spectrum most commonly used in relation to the biological endpoints considered here.

Central wavelength: estimated as the wavelength that divides the action in two equal parts, for SZA=30°, Ozone=300DU

Threshold: this represents the exposure dose required for the biological endpoint to occur.

Time scale: the duration of exposure required for the biological endpoint to occur.

Reciprocity: “yes” implies that the biological endpoint depends only on the exposure dose of radiation and not on the rate at which the energy is administered (i.e. exposure to UVI = 1 for 10 minutes has the same effect as exposure to UVI=10 for 1 minute)

Saturation: is a steady-state achieved with ongoing exposure?

Strategy to optimize: refers to the UVR exposure strategy that would best achieve beneficial biological endpoints and avoid adverse biological endpoints



## References

1. ICNIRP. ICNIRP Guidelines on limits of exposure to ultraviolet radiation of wavelengths between 180nm and 400nm (incoherent optical radiation). *Health Phys* 2004;87(2):171-86.
2. Commission Internationale de L'Eclairage. CIE 174:2006 Action Spectrum for the Production of Previtamin D3 in Human Skin 2006 [Available from: [http://div2.cie.co.at/?i\\_ca\\_id=611&pubid=187](http://div2.cie.co.at/?i_ca_id=611&pubid=187)].
3. Damian DL, Barnetson RS, Halliday GM. Low-dose UVA and UVB have different time courses for suppression of contact hypersensitivity to a recall antigen in humans. *J Invest Dermatol* 1999;112(6):939-44. doi: 10.1046/j.1523-1747.1999.00610.x
4. Fitzpatrick TB. The validity and practicality of sun-reactive skin types I through VI. *Arch Dermatol* 1988;124(6):869-71. [published Online First: 1988/06/01]
5. Diffey B, Robson J. A new substrate to measure sunscreen protection factors throughout the ultraviolet spectrum. *J Soc Cosmet Chem* 1989;40:127-33.
